# Supplementary material for: Hydrothermal fabrication of Sn/SnO/SnO2 hybrid nanocomposites as highly reliable anodes for advanced lithium-ion batteries
Source: Royal Society of Chemistry journal article supplement (doi:10.1039/d3nj01752d), 2023-01-01
Supplement: d3nj01752d1.pdf [file d3nj01752d1.pdf]

## **SUPPLEMENTARY INFORMATION**

### **Hydrothermal Fabrication of Sn/SnO/SnO<sub>2</sub> Hybrid Nanocomposites as Highly Reliable Anodes for Advanced Lithium-ion Batteries**

*Nguyen Nhat Nam,<sup>a</sup> Thanh Tung Nguyen,<sup>b</sup> Thuy-An Nguyen,<sup>c,d</sup> Hai Dang Ngo,<sup>e</sup> Thi Hai  
Yen Nguyen,<sup>f</sup> Van Man Tran,<sup>g,h,i</sup> Minh Thu Nguyen,<sup>h,i</sup> Dinh Quan Nguyen,<sup>ij</sup> Tuan Loi  
Nguyen,<sup>\*c,d</sup> Hoai Phuong Pham<sup>\*b</sup>*

<sup>a</sup> Biotechnology Center, School of Agriculture and Aquaculture, Tra Vinh University, Tra  
Vinh City, Vietnam

<sup>b</sup> NTT Hi-Tech Institute, Nguyen Tat Thanh University, 298-300A Nguyen Tat Thanh Street,  
Ward 13, District 4, Ho Chi Minh City 700000, Vietnam

<sup>c</sup> Institute of Fundamental and Applied Sciences, Duy Tan University, Ho Chi Minh City  
700000, Vietnam

<sup>d</sup> Faculty of Environmental and Chemical Engineering, Duy Tan University, Da Nang City  
550000, Vietnam

<sup>e</sup> Faculty of Applied Sciences, Ho Chi Minh City University of Technology and Education  
(HCMUTE), Thu Duc City, Ho Chi Minh City, Vietnam

<sup>f</sup> Faculty of Science, Dong Nai University, 4 Le Quy Don Street, Tan Hiep Ward, Bien Hoa  
City 76111, Vietnam

<sup>g</sup> Department of Physical Chemistry, Faculty of Chemistry, VNUHCM-University of Science

<sup>h</sup> Applied Physical Chemistry Laboratory (APCLAB), VNUHCM-University of Science

<sup>i</sup> Vietnam National University Ho Chi Minh City, Linh Trung Ward, Thu Duc District, Ho Chi  
Minh City, Vietnam

<sup>j</sup> Laboratory of Biofuel and Biomass Research, Faculty of Chemical Engineering, Ho Chi  
Minh City University of Technology (HCMUT), 268 Ly Thuong Kiet Street, District 10, Ho  
Chi Minh City, Vietnam

\*Correspondence: [nguyentuanloi@duytan.edu.vn](mailto:nguyentuanloi@duytan.edu.vn) (T.L. Nguyen), and [phphuong@ntt.edu.vn](mailto:phphuong@ntt.edu.vn)  
(H.P. Pham)

E-mail: [nguyentuanloi@duytan.edu.vn](mailto:nguyentuanloi@duytan.edu.vn) (T.L. Nguyen), and [phphuong@ntt.edu.vn](mailto:phphuong@ntt.edu.vn) (H.P. Pham)

The contribution ratios of the pseudo and diffusive behaviors were quantified using **Eq. S1**.

$$i(V) = k_1 v + k_2 v^{1/2} = i_p + i_d \quad (S1)$$

Where:

$i$  is the current, and  $v$  is the scan rate.  $i_p = k_1 v$  is the current related to the pseudo process, and  $i_d = k_2 v^{1/2}$  is the current related to the diffusive process.

At any potential  $V_x$ , **Eq. S1** can be rewritten as:

$$\begin{pmatrix} y_{1x} \\ y_{2x} \\ y_{3x} \\ y_{4x} \\ y_{5x} \end{pmatrix} = \begin{pmatrix} v_1 & v_1^{1/2} \\ v_2 & v_2^{1/2} \\ v_3 & v_3^{1/2} \\ v_4 & v_4^{1/2} \\ v_5 & v_5^{1/2} \end{pmatrix} \cdot \begin{pmatrix} k_{1x} \\ k_{2x} \end{pmatrix} \quad (S2)$$

When  $x$  ranges from 1 to  $X$ , matrix **(S2)** can be rewritten as matrix **(S3)**.

$$\begin{pmatrix} y_{11} & y_{12} \dots & y_{1X} \\ y_{21} & y_{22} \dots & y_{2X} \\ y_{31} & y_{32} \dots & y_{3X} \\ y_{41} & y_{42} \dots & y_{4X} \\ y_{51} & y_{52} \dots & y_{5X} \end{pmatrix} = \begin{pmatrix} v_1 & v_1^{1/2} \\ v_2 & v_2^{1/2} \\ v_3 & v_3^{1/2} \\ v_4 & v_4^{1/2} \\ v_5 & v_5^{1/2} \end{pmatrix} \cdot \begin{pmatrix} k_{11} & k_{12} \dots & k_{1X} \\ k_{21} & k_{22} \dots & k_{2X} \end{pmatrix} \quad (S3)$$

$$\text{Contribution of pseudo (\%)} = \frac{\text{Areas of pseudo curve}}{\text{Areas of pseudo curve} + \text{Areas of diffusive curve}} \times 100 \quad (S4)$$

$$\text{Contribution of diffusive (\%)} = \frac{\text{Areas of diffusive curve}}{\text{Areas of pseudo curve} + \text{Areas of diffusive curve}} \times 100 \quad (S5)$$

The values of  $k_{1x}$  and  $k_{2x}$  at each  $V_x$  were calculated by solving matrix **(S3)**. The curves of the pseudo and diffusive behaviors were drawn based on  $i_p$  and  $i_d$  at each  $V_x$  using **Eq. S1**. The areas of the pseudo and diffusive curves at each scan rate were determined using *Simpson's integration* method to calculate the pseudo and diffusive contributions to the total process, as shown in **Eq. S4** and **Eq. S5**.

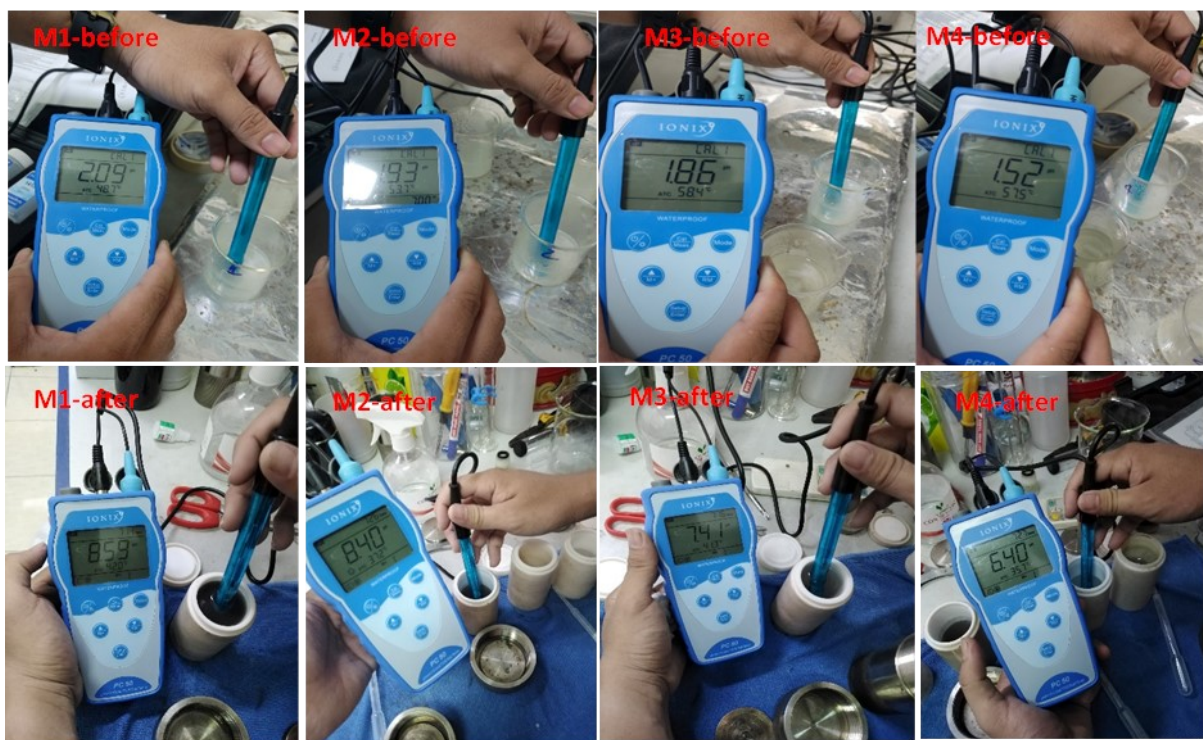

**Fig. S1.** The change of pH value before and after hydrothermal process for all samples.

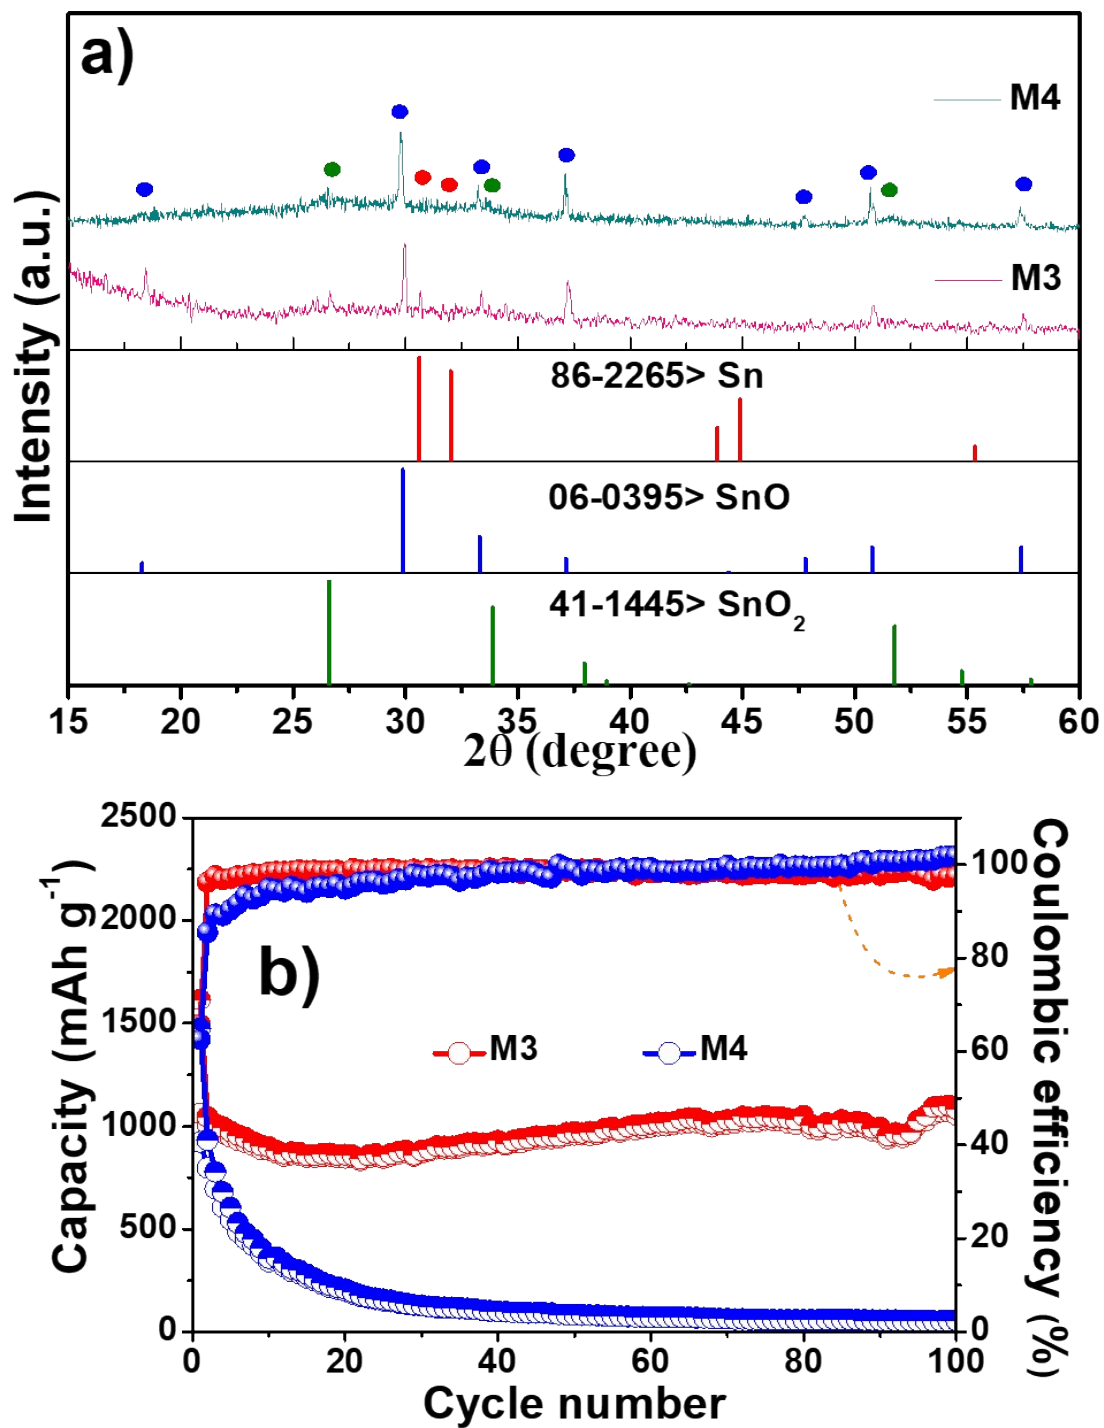

**Fig. S2.** (a) Powder XRD pattern of M3 and M4 samples and the reference peaks of Sn, SnO, and SnO<sub>2</sub>. (b) Cycling performances of M3 and M4 electrode.

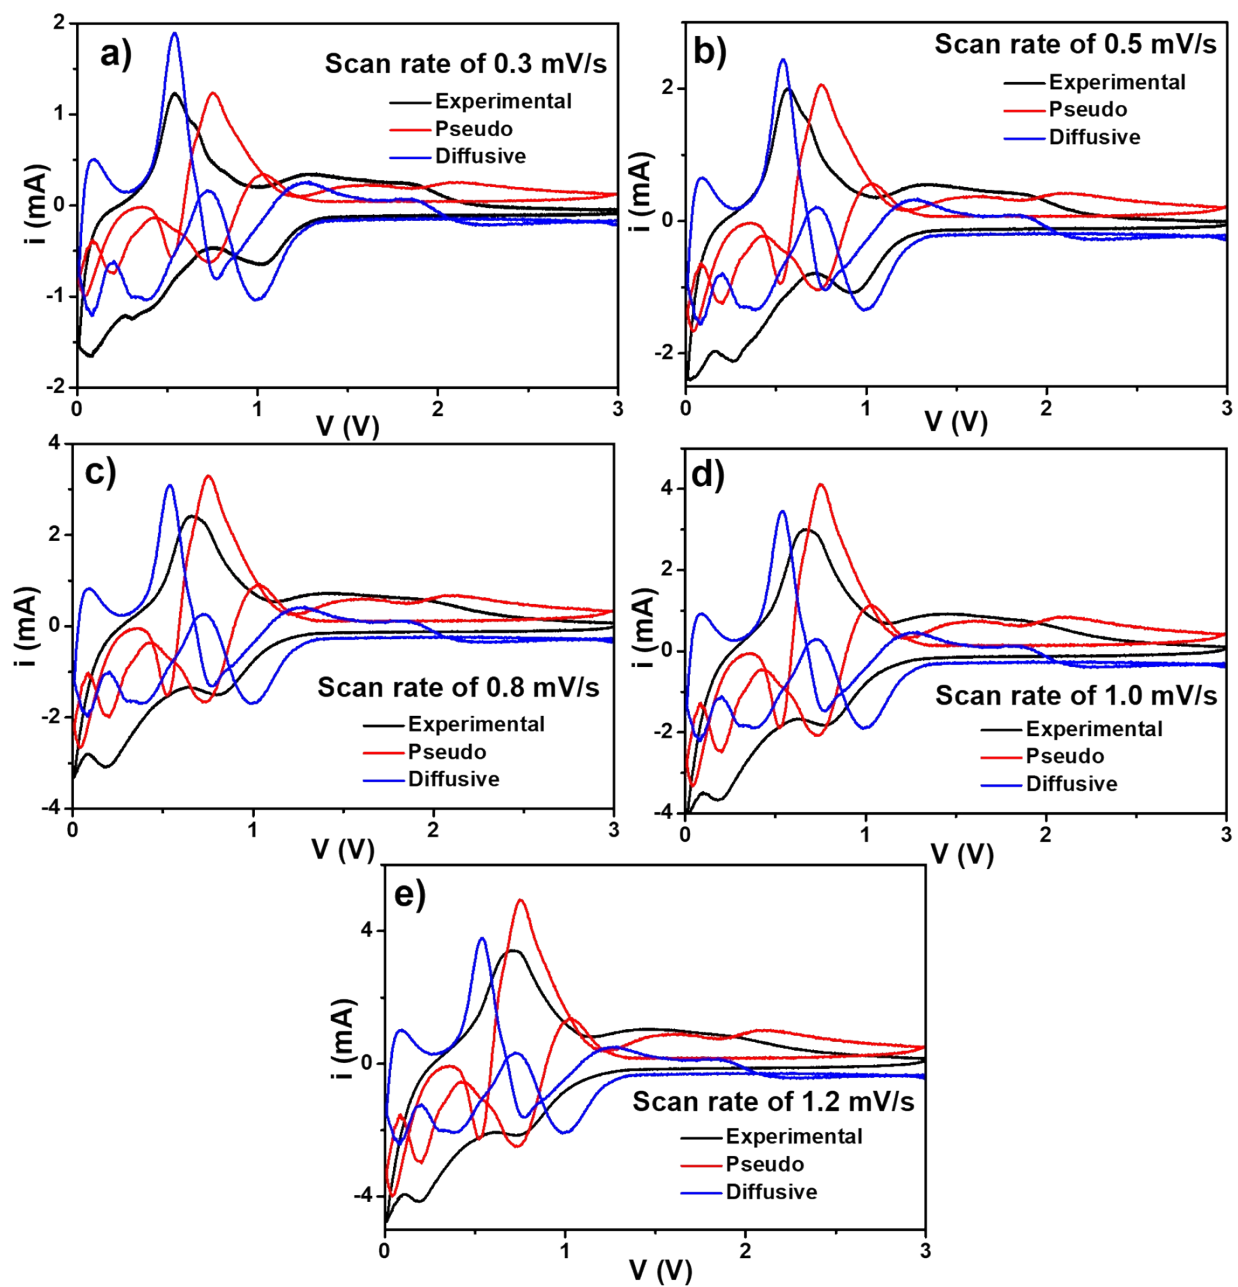

**Fig. S3.** (a–e) details of pseudo and diffusive curves at various scan rates of M1 electrode.

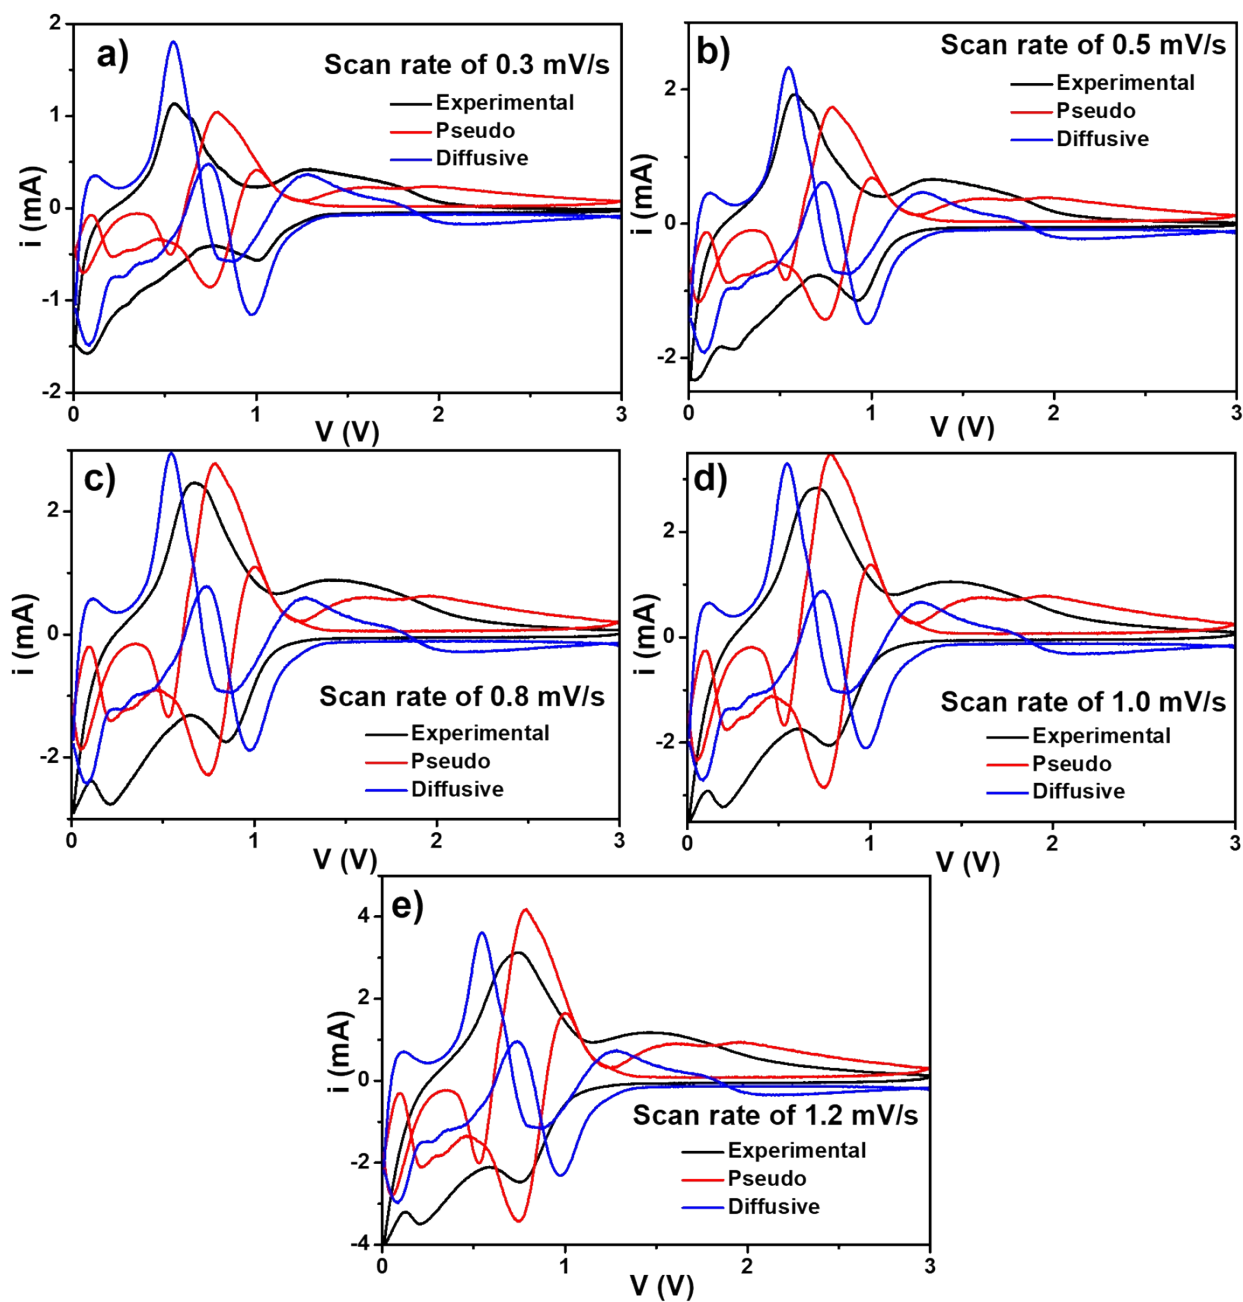

**Fig. S4.** (a–e) details of pseudo and diffusive curves at various scan rates of M2 electrode.

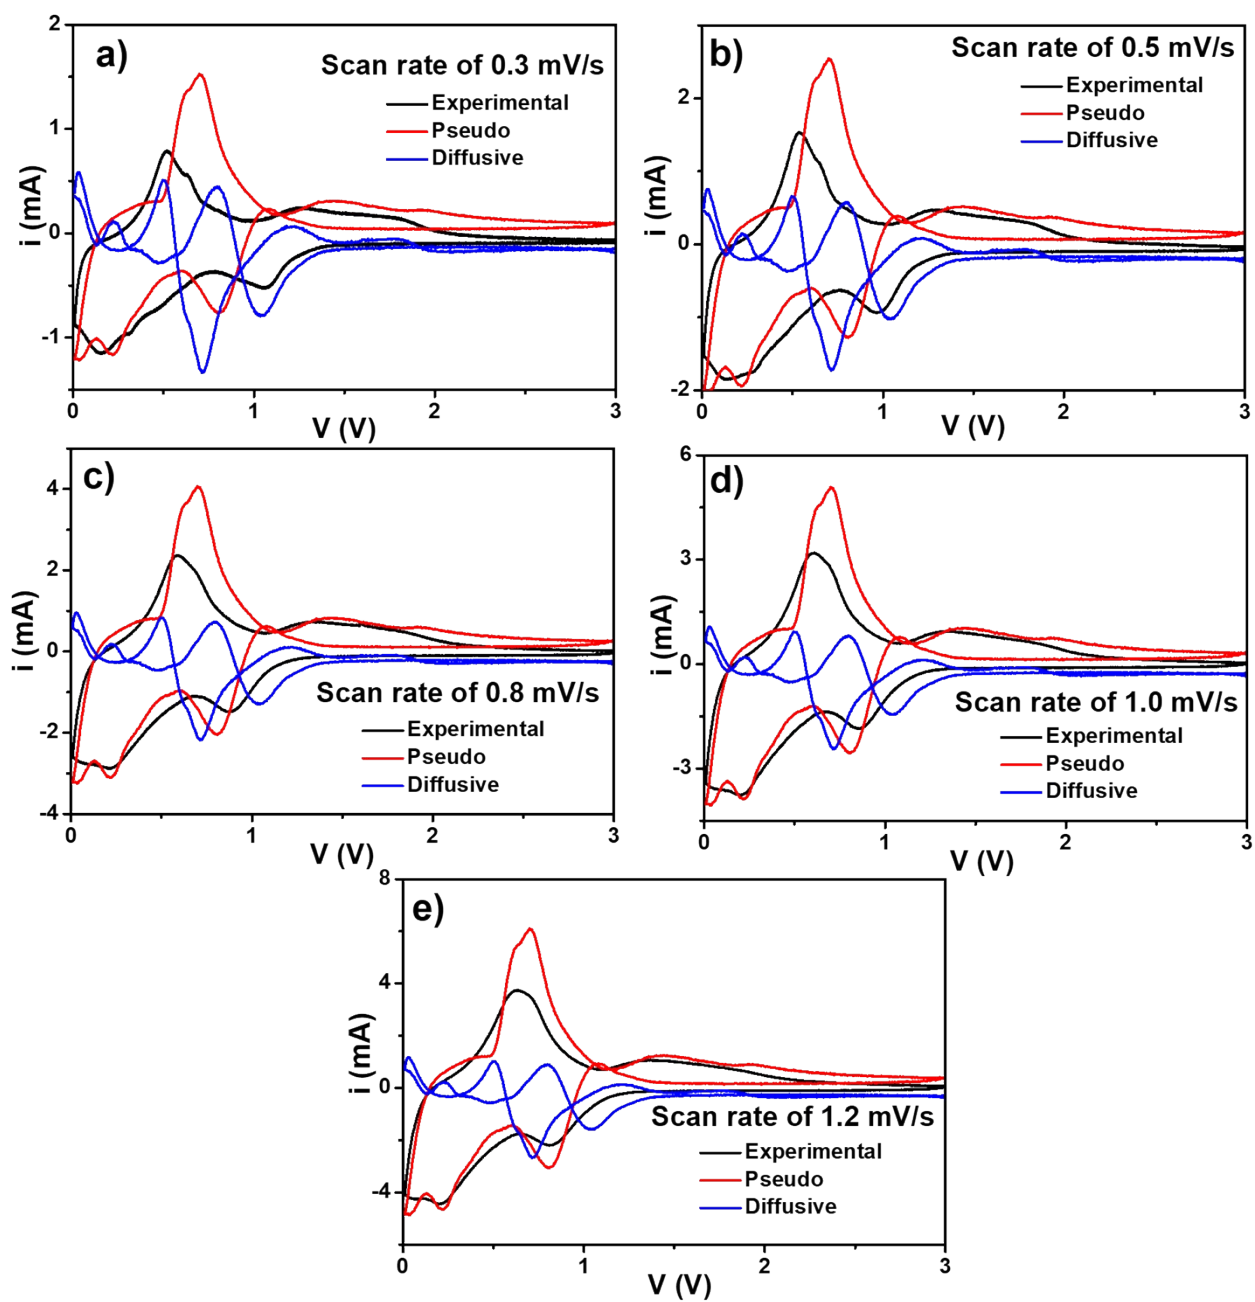

**Fig. S5.** (a–e) details of pseudo and diffusive curves at various scan rates of M3 electrode.

**Table S1.** EDS results for the prepared samples.

| <i>% Atom</i> |                        |
|---------------|------------------------|
| <b>M1</b>     | Sn : O = 21.99 : 78.01 |
| <b>M2</b>     | Sn : O = 26.13 : 73.87 |
| <b>M3</b>     | Sn : O = 26.66 : 73.34 |

**Table S2.** EIS results for the prepared electrodes.

|                                      | <b>M1</b> | <b>M2</b> | <b>M3</b> |
|--------------------------------------|-----------|-----------|-----------|
| <b><math>R_S (\Omega)</math></b>     | 2.46      | 6.74      | 2.42      |
| <b><math>R_{SEI} (\Omega)</math></b> | 2.10      | 1.56      | 1.63      |
| <b><math>R_{CT} (\Omega)</math></b>  | 16.35     | 4.50      | 3.15      |
